# Supplementary material for: Preconceptional Immunization Can Modulate Offspring Intrathymic IL-17-Producing γδT Cells with Epigenetic Implications Mediated by microRNAs
Source: MDPI journal article supplement (doi:10.3390/ijms22126633), 2021-06-21
Supplement: s1 [file s1]

**Title:** *Preconceptional immunization can modulate offspring intrathymic IL-17-producing  $\gamma\delta$ T cells: possible epigenetic implications mediated by microRNA*

**Authors:** Thamires Rodrigues de Sousa, Rodrigo Pessôa, Andrezza Nascimento, Beatriz Oliveira Fagundes, Fábio da Ressureição Sgnotto, Alberto José da Silva Duarte, Sabri Saeed Sanabani and Jefferson Russo Victor.

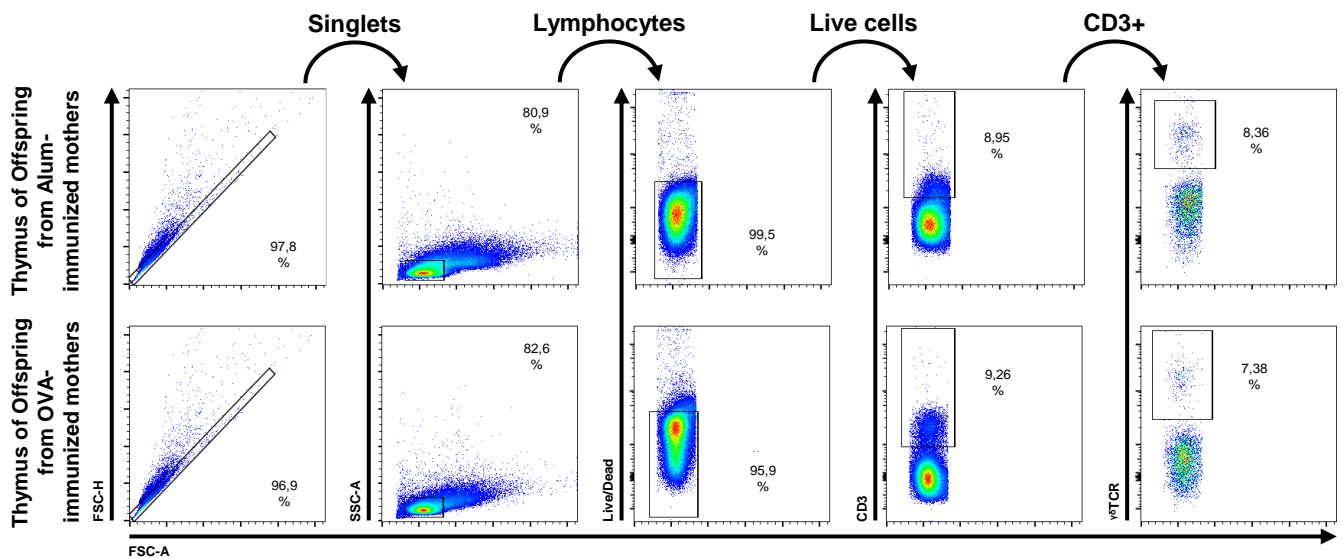

**Figure S1: Illustrative dot plots of the gating strategy used to identify thymic  $\gamma\delta$ T cells in neonatal offspring thymus.** Each sample was acquired by a consecutive approach using a single-cell gate (determined by FSC-A/FSC-H parameters), a lymphocyte gate (determined by relative SSC-A/FSC-A), a live cell gate (determined by Live/Dead staining), a CD3+ cell gate, and, finally, a  $\gamma\delta$ TCR+ cell gate. This figure illustrates the gating strategy in both experimental groups (Alum-immunized mothers and OVA-immunized mothers).

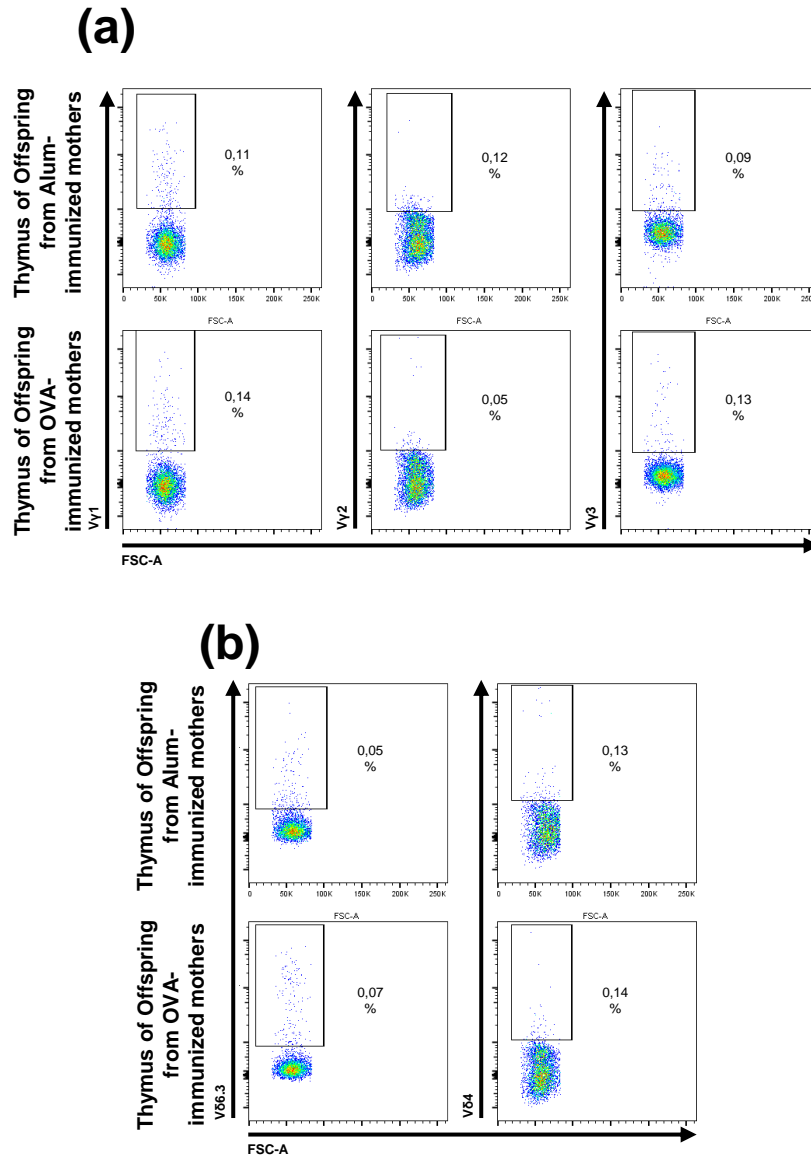

**Figure S2: Illustrative dot plots of the gating strategy used to identify thymic variable chains expression on neonatal thymic  $\gamma\delta$ T cells.** As demonstrated in figure S1, each sample was acquired by a consecutive approach using a single-cell gate, a lymphocyte gate, a live cell gate, a CD3+ cell gate, and, finally, a  $\gamma\delta$ TCR+ cell gate. These samples were then acquired and gated as V $\gamma$ 1+, V $\gamma$ 2+ or V $\gamma$ 3+ (a), and V $\delta$ 6.3+ or V $\delta$ 4+ (b). This figure illustrates the gating strategy in both experimental groups (Alum-immunized mothers and OVA-immunized mothers).
